# Supplementary material
Source: PubMed Central journal article supplement (PMC8846317)
Supplement: jb.00494-21-s0001.pdf [file jb.00494-21-s0001.pdf]

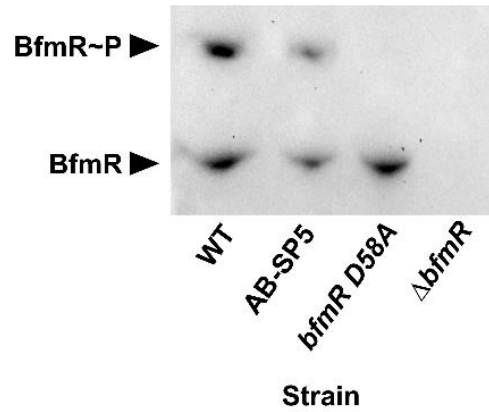

**Figure S1. BfmR is phosphorylated *in vivo*.** Control Phos-tag™ gel and western blot analysis of the BfmR phosphorylation state in *A. baumannii* strains ATCC 17961 wild type (WT), an uncharacterized mutant (AB-SP5), *bfmR D58A*, and  $\Delta$ *bfmR*. Strain AB-SP5 is unrelated to this study. Strains were grown in LB at 37°C for 6 h. Results are representative of at least three independent experiments.
